# Supplementary material for: Standardized image evaluation in patients with idiopathic normal pressure hydrocephalus: consistency and reproducibility
Source: Springer Nature journal article supplement (doi:10.1007/s00234-019-02273-2), 2019-08-09
Supplement: MOESM1 [file 17053874]

|                                                                                                                                                       |                                                                                              |                                                                                               |                                                                                                |
|-------------------------------------------------------------------------------------------------------------------------------------------------------|----------------------------------------------------------------------------------------------|-----------------------------------------------------------------------------------------------|------------------------------------------------------------------------------------------------|
| <p><b>Evans' index</b></p> <p>0 = <math>\leq 0.25</math><br/> 1 = <math>&gt; 0.25 - 0.3</math><br/> 2 = <math>&gt; 0.3</math></p>                     | <p>0</p>    | <p>1</p>    | <p>2</p>    |
| <p><b>Narrow Sulci</b></p> <p>0 = Normal<br/> 1 = Parafalcine<br/> 2 = Vertex</p>                                                                     | <p>0</p>    | <p>1</p>    | <p>2</p>    |
| <p><b>Sylvian Fissures</b></p> <p>0 = Normal<br/> 1 = Enlarged</p>                                                                                    | <p>0</p>    | <p>1</p>    |                                                                                                |
| <p><b>Focally enlarged sulci</b></p> <p>0 = Not present<br/> 1 = Present</p>                                                                          | <p>0</p>  | <p>1</p>  |                                                                                                |
| <p><b>Temporal horns</b></p> <p>0 = <math>&lt; 4</math> mm<br/> 1 = <math>4 - &lt; 6</math> mm<br/> 2 = <math>\geq 6</math> mm</p>                    | <p>0</p>  | <p>1</p>  | <p>2</p>  |
| <p><b>Callosal angle</b></p> <p>0 = <math>&gt; 90^\circ</math><br/> 1 = <math>90^\circ - &gt; 60^\circ</math><br/> 2 = <math>\leq 60^\circ</math></p> | <p>0</p>  | <p>1</p>  | <p>2</p>  |
| <p><b>Periventricular hypodensities</b></p> <p>0 = Not present<br/> 1 = Frontal horn caps<br/> 2 = Confluent areas</p>                                | <p>0</p>  | <p>1</p>  | <p>2</p>  |
